# Supplementary material
Source: MDPI journal article supplement (https://www.mdpi.com/1424-2818/14/5/323)
Supplement: s1 [file s1]

Archive with 7 entries (7 files):
- supplementary materials/Supporting information.pdf
- supplementary materials/Table S1.xlsx
- supplementary materials/Table S2.xlsx
- supplementary materials/Table S3.pdf
- supplementary materials/Table S4.pdf
- supplementary materials/Table S5.xlsx
- supplementary materials/Table S6.xlsx
