# Supplementary material
Source: MDPI journal article supplement (https://www.mdpi.com/1424-2818/14/5/323)
Supplement: s1 [file s1 › supplementary materials/Table S1.xlsx]

## Sheet: Sheet1
Table S1. Gene composition in the C. monnieri chloroplast genome.
	Gene group	Gene name
Self replication	Ribosomal RNA genes	rrn4.5c,rrn5c,rrn16c,rrn23c
	Transfer RNA genes	trnA-UGCb,c,trnC-GCA,trnD-GUC,trnE-UUC,trnF-GAA,trnG-GCC,trnG-UCCb
		trnH-GUG,trnI-CAUc,trnI-GAUb,c,trnK-UUUb,trnL-CAAc,trnL-UAG,trnL-UAAb
		trnM-CAU,trnfM-CAU,trnN-GUUc,trnP-UGG,trnQ-UUG,trnR-UCU,trnR-ACGc
		trnS-UGA,trnS-GGA,trnS-GCU,trnT-GGU,trnT-UGU,trnV-GACc,trnV-UACb
		trnW-CCA,trnY-GUA
	Small subunit of ribosome	rps2,rps3,rps4,rps7c,rps8,rps11,rps12ac,rps14,rps15,rps16b,rps18,rps19
	Large subunit of ribosome	rpl2b,rpl14,rpl16b,rpl20,rpl22,rpl23,rpl32,rpl33,rpl36
	RNA polymerase subunits	rpoA,rpoB,rpoC1b,rpoC2
Photosynthesis	NADH dehydrogenase	ndhAb,ndhBbc,ndhC,ndhD,ndhE,ndhF,ndhG,ndhH,ndhI,ndhJ,ndhK
	Photosystem I	psaA,psaB,psaC,psaI,psaJ
	Photosystem II	psbA,psbB,psbC,psbD,psbE,psbF,psbH,psbI,psbJ,psbK,psbL,psbM,psbN,psbT,psbZ
	PS I assembly factor	ycf3a,ycf4
	Cytochrome b/f complex	petA,petBb,petDb,petG,petL,petN
	ATP synthase	atpA, atpB, atpE, atpFb, atpH, atpI
	Rubisco	rbcL
Other genes	Maturase	matK
	Envelope membrane protein	cemA
	Subunit of acetyl-CoA-carboxylase	accD
	c-type cytochrome synthesis gene	ccsA
	Protease	clpPa
	Tanslational initiation factor	infA
Genes of unknown function	Conserved open reading frames	ycf1c, ycf2, ycf15c
aGene with two introns.
bGene with one intron.
cGenes located in the inverted repeats.
