# Supplementary material
Source: MDPI journal article supplement (https://www.mdpi.com/1424-2818/14/5/323)
Supplement: s1 [file s1 › supplementary materials/Table S2.xlsx]

## Sheet: repeat sequence
Table S2. The repeat sequences and simple sequence repeats (SSRs) in the C. monnieri chloroplast genome.
Repeat I Start	Repeat II Start	Type	Lenth(bp)	Region
92638	92656	F	113	LSC;ycf2
1064	71566	F	69	LSC; trnL-CAA-trnH-GUG, rps12-clpP
92692	92710	F	63	LSC;ycf2
92638	92674	F	60	LSC;ycf2
92663	92717	F	52	LSC;ycf2
92681	92717	F	52	LSC;ycf2
1092	71594	F	41	LSC; trnL-CAA-trnH-GUG, rps12-clpP
92645	92717	F	46	LSC;ycf2
92674	92728	F	41	LSC;ycf2
92692	92728	F	41	LSC;ycf2
99388	122613	F	41	IRb,SSC; rps12-ycf15, ndhA intron
92631	92721	F	42	LSC;ycf2
92638	92692	F	42	LSC;ycf2
45824	99390	F	39	LSC, IRb; ycf3 intron, rps12-ycf15
45824	122615	F	39	LSC,SSC; ycf3 intron, ndhA intron
92656	92728	F	41	LSC;ycf2
108490	108522	F	34	IRb; rrn4.5-rrn5
133178	133210	F	34	IRa; rrn5-rrn4.5
99396	122621	F	33	IRb, SSC; rps12-ycf15, ndhA intron
21913	21962	F	35	LSC; rpoC2-rpoC1
45827	96326	F	35	LSC, IRb; ycf3 intron, ndhB intron
46808	46812	F	35	LSC; ycf3-trnS-GGA
92631	92739	F	34	LSC;ycf2
9576	37588	F	30	LSC; psbI-trnS-GCU, psbC-trnS-UGA
32865	32889	F	32	LSC; trnE-UUC-trnT-GGU
23934	115231	F	31	LSC,SSC; rpoC1 intron, ndhF-rpl32
108843	132860	F	31	IRb, IRa; rrn5-trnR-ACG, trnR-ACG-rrn5
40795	43019	F	30	LSC; psaB, psaA
48634	68218	F	30	LSC; rps4-trnT-UGU, trnW-CCA-trnP-UGG
90195	90237	F	30	LSC; ycf2
91368	91383	F	30	LSC; ycf2
122613	142305	P	41	SSC, IRa; ndhA intron, ycf15-rps12
1428	1467	P	33	LSC; trnH-GUG-psbA
989	87873	P	39	LSC; trnL-CAA-trnH-GUG, rpl23-trnI-CAU
45824	142305	P	39	LSC, IRa; ycf3 intron, ycf15-rps12
108490	133178	P	34	IRb, IRa; rrn4.5-rrn5, rrn5-rrn4.5
108522	133210	P	34	IRb, IRa; rrn4.5-rrn5, rrn5-rrn4.5
32169	32698	P	39	LSC; psbM-trnD-GUC, trnE-UUC-trnT-GGU
66815	66840	P	39	LSC; psbE-petL
9579	47532	P	30	LSC; psbI-trnS-GCU, trnS-GGA-rps4
122621	142305	P	33	SSC, IRa; ndhA intron, ycf15-rps12
45827	145373	P	35	LSC, IRa; ycf3 intron, ndhB intron
33899	46807	P	30	LSC; trnT-GGU-psbD, ycf3-trnS-GGA
33899	46811	P	30	LSC; trnT-GGU-psbD, ycf3-trnS-GGA
37591	47532	P	30	LSC; psbC-trnS-UGA, trnS-GGA- rps4
1326	1334	R	33	LSC; trnH-GUG-psbA
44585	46810	R	30	LSC; psaA-ycf3, ycf3-trnS-GGA

## Sheet: SSR
Table S2. The repeat sequences and simple sequence repeats (SSRs) in the C. monnieri chloroplast genome.
Motif	Length	Region	Location
(T)11	11	LSC	trnH-GUG-trnL-CAA
(TTTA)3	12	LSC	trnH-GUG-psbA
(AATA)3	12	LSC	trnK-UUU intron
(A)10	10	LSC	trnK-UUU-rps16
(TA)5	10	LSC	trnK-UUU-rps16
(G)15	15	LSC	trnS-GCU-trnG-UCC
(T)10	10	LSC	trnS-GCU-trnG-UCC
(AT)6	12	LSC	trnG-UCC-trnR-UCU
(AT)5	10	LSC	trnR-UCU-atpA
(A)11	11	LSC	atpA-atpF
(A)10	10	LSC	atpF-atpH
(AT)8	16	LSC	atpF-atpH
(T)10	10	LSC	atpH-atpI
(A)15	15	LSC	rps2-rpoC2
(T)11	11	LSC	rpoC2
(AT)5	10	LSC	rpoC2
(T)13	13	LSC	rpoC1 intron
(T)12	12	LSC	rpoB
(AT)5	10	LSC	rpoB-trnC-GCA
(A)10	10	LSC	rpoB-trnC-GCA
(T)11	11	LSC	rpoB-trnC-GCA
(T)10	10	LSC	petN-psbM
(AT)5	10	LSC	petN-psbM
(T)12	12	LSC	psbM-trnD-GUC
(T)12	12	LSC	psbM-trnD-GUC
(A)12	12	LSC	psbM-trnD-GUC
(A)12	12	LSC	trnG-GCC-trnfM-CAU
(TTTTA)3	15	LSC	trnfM-CAU-rps14
(A)15	15	LSC	psaA-ycf3
(T)10	10	LSC	ycf3 intron
(A)25	25	LSC	ycf3-trnS-GGA
(TA)5	10	LSC	rps4-trnT-UGU
(AT)5	10	LSC	ndhJ
(T)11	11	LSC	ndhK-ndhC
(T)10	10	LSC	ndhC-trnV-UAC
(T)10	10	LSC	trnM-CAU-atpE
(AATCA)3	15	LSC	trnM-CAU-atpE
(T)10	10	LSC	atpB
(ATA)4	12	LSC	atpB-rbcL
(A)10	10	LSC	atpB-rbcL
(T)10	10	LSC	rbcL-accD
(A)10	10	LSC	rbcL-accD
(T)11	11	LSC	psaI-ycf4
(TA)5	10	LSC	petA-psbJ
(TA)5	10	LSC	petA-psbJ
(TA)6	12	LSC	trnW-CCA-trnP-UGG
(TA)5	10	LSC	trnW-CCA-trnP-UGG
(TCCT)3	12	LSC	psaJ-rpl33
(TA)5	10	LSC	rpl33-rps18
(T)14	14	LSC	clpP intron
(T)12	12	LSC	clpP-psbB
(A)10	10	LSC	rpl14-rpl16
(AT)5	10	LSC	rpl22-rps19
(T)14	14	LSC	rps19-rpl2
(T)15	15	IRb	rps12-ycf15
(G)12	12	IRb	trnA-UGC intron
(AGGT)3	12	IRb	rrn23
(T)10	10	IRb	trnR-ACG-trnN-GUU
(A)10	10	IRb	ycf1
(TA)5	10	SSC	ndhF
(TA)6	12	SSC	ndhF-rpl32
(T)11	11	SSC	rpl32-trnL-UAG
(TA)7	14	SSC	ccsA
(AT)5	10	SSC	ccsA
(TCTT)3	12	SSC	ndhE-ndhG
(A)10	10	SSC	ndhE-ndhG
(TA)5	10	SSC	ndhG-ndhI
(A)13	13	SSC	ndhG-ndhI
(T)11	11	SSC	ndhG-ndhI
(CAAT)3	12	SSC	ndhG-ndhI
(TA)5	10	SSC	ycf1
(T)17	17	SSC	ycf1
(T)10	10	SSC	ycf1
(A)10	10	SSC	ycf1
(T)10	10	IRa	ycf1
(A)10	10	IRa	trnN-GUU-trnR-ACG
(CTAC)3	12	IRa	rrn23
(C)12	12	IRa	trnA-UGC intron
(A)15	15	IRa	ycf15-rps12
