# Supplementary material
Source: MDPI journal article supplement (https://www.mdpi.com/1424-2818/14/5/323)
Supplement: s1 [file s1 › supplementary materials/Table S5.xlsx]

## Sheet: Sheet1
Table S5. The rates of Ka, Ks, and Ka/Ks of 79 protein-coding genes among 13 Selineae species.
Genes	Species	Ka	Ks	Ka/Ks	Length
accD	A. dahurica	0.00256696	0.00678049	0.378579	1467
	A. gigas	0.0025662	0.00678844	0.378025	1467
	A. laxifoliata	0.00516259	0.00681539	0.757491	1461
	G. littoralis	0.00171038	0.0136212	0.125567	1467
	L. buchtormensis	0.00256696	0.00678049	0.378579	1467
	Lig. likiangense	0.00428214	0.00678683	0.630949	1467
	Lig. thomsonii	0.00171033	0.00678049	0.252242	1467
	M. pimpinelloideum	0.00428582	0.0101688	0.421467	1467
	P. japonicum	0.00342558	0.00677257	0.505802	1467
	P. praeruptorum	0.00342456	0.00678049	0.505061	1467
	S. divaricata	0.00342456	0.00678049	0.505061	1467
	Ses. montanum	0.00256771	0.0136069	0.188707	1467
atpA	A. dahurica	0.000873822	0.00533903	0.163667	1521
	A. gigas	0.000873822	0.00802286	0.108916	1521
	A. laxifoliata	0.000873822	0.00802286	0.108916	1521
	G. littoralis	0.000873822	0.00533903	0.163667	1521
	L. buchtormensis	0	0.00533842	0	1521
	Lig. likiangense	0	0.00802195	0	1521
	Lig. thomsonii	0	0.00533842	0	1521
	M. pimpinelloideum	0	0.0107163	0	1521
	P. japonicum	0	0.0107151	0	1521
	P. praeruptorum	0	0.013418	0	1521
	S. divaricata	0.000873822	0.0134195	0.0651157	1521
	Ses. montanum	0.000873722	0.00802565	0.108866	1521
atpB	A. dahurica	0	0.00540826	0	1494
	A. gigas	0.000890942	0	NA	1494
	A. laxifoliata	0	0	NA	1494
	G. littoralis	0	0	NA	1494
	L. buchtormensis	0	0.00269957	0	1494
	Lig. likiangense	0	0.00540888	0	1494
	Lig. thomsonii	0	0.00269957	0	1494
	M. pimpinelloideum	0.000890942	0.00270082	0.329879	1494
	P. japonicum	0.000891351	0.00269707	0.330489	1494
	P. praeruptorum	0.000891351	0.00540387	0.164947	1494
	S. divaricata	0	0	NA	1494
	Ses. montanum	0	0.00269957	0	1494
atpE	A. dahurica	0	0.0098519	0	420
	A. gigas	0	0	NA	420
	A. laxifoliata	0	0.0098519	0	420
	G. littoralis	0	0	NA	420
	L. buchtormensis	0	0	NA	420
	Lig. likiangense	0	0	NA	420
	Lig. thomsonii	0	0	NA	420
	M. pimpinelloideum	0.00314956	0	NA	420
	P. japonicum	0	0	NA	420
	P. praeruptorum	0	0	NA	420
	S. divaricata	0	0	NA	420
	Ses. montanum	0	0.0098519	0	420
atpF	A. dahurica	0.00240511	0	NA	543
	A. gigas	0.0024071	0	NA	543
	A. laxifoliata	0.00240511	0	NA	543
	G. littoralis	0.00240411	0	NA	543
	L. buchtormensis	0.00240487	0	NA	543
	Lig. likiangense	0.00481795	0.0240886	0.20001	543
	Lig. thomsonii	0	0	NA	543
	M. pimpinelloideum	0.00240335	0.0079631	0.301811	543
	P. japonicum	0.0024061	0	NA	543
	P. praeruptorum	0.0024061	0.00793304	0.303301	543
	S. divaricata	0.00240809	0.00791146	0.304381	543
	Ses. montanum	0.0024071	0.00792223	0.303841	543
atpH	A. dahurica	0	0	NA	243
	A. gigas	0	0	NA	243
	A. laxifoliata	0	0	NA	243
	G. littoralis	0	0.0149673	0	243
	L. buchtormensis	0	0.0149673	0	243
	Lig. likiangense	0	0	NA	243
	Lig. thomsonii	0	0	NA	243
	M. pimpinelloideum	0	0	NA	243
	P. japonicum	0	0	NA	243
	P. praeruptorum	0	0	NA	243
	S. divaricata	0	0	NA	243
	Ses. montanum	0	0	NA	243
atpI	A. dahurica	0	0.011118	0	741
	A. gigas	0.00178911	0.0111074	0.161073	741
	A. laxifoliata	0	0.00553841	0	741
	G. littoralis	0	0.00553841	0	741
	L. buchtormensis	0	0.011118	0	741
	Lig. likiangense	0	0.00553841	0	741
	Lig. thomsonii	0.00179021	0	NA	741
	M. pimpinelloideum	0.00178856	0.011118	0.16087	741
	P. japonicum	0	0.0111286	0	741
	P. praeruptorum	0	0.00553841	0	741
	S. divaricata	0	0.00553841	0	741
	Ses. montanum	0	0.00553841	0	741
ccsA	A. dahurica	0.00531823	0.00461824	1.15157	972
	A. gigas	0.00531944	0	NA	972
	A. laxifoliata	0.00665218	0.00927246	0.717413	972
	G. littoralis	0.00531581	0.00462557	1.14922	972
	L. buchtormensis	0.00265635	0.0185982	0.142829	972
	Lig. likiangense	0.00665826	0	NA	972
	Lig. thomsonii	0.00132639	0.0092561	0.1433	972
	M. pimpinelloideum	0.00398695	0	NA	972
	P. japonicum	0.00265454	0.00926345	0.28656	972
	P. praeruptorum	0.00398533	0.00926345	0.430221	972
	S. divaricata	0.00132639	0.0092561	0.1433	972
	Ses. montanum	0.00265454	0.00926345	0.28656	972
cemA	A. dahurica	0.00555309	0	NA	687
	A. gigas	0.00369539	0	NA	687
	A. laxifoliata	0.00740957	0	NA	687
	G. littoralis	0.00555309	0	NA	687
	L. buchtormensis	0.00369564	0.00695318	0.531503	687
	Lig. likiangense	0.00184437	0	NA	687
	Lig. thomsonii	0.00369446	0	NA	687
	M. pimpinelloideum	0.0074025	0	NA	687
	P. japonicum	0.00369446	0.00696151	0.530698	687
	P. praeruptorum	0.00369446	0.0139882	0.264112	687
	S. divaricata	0.00554678	0.00696985	0.795824	687
	Ses. montanum	0.00369446	0.0139882	0.264112	687
clpP	A. dahurica	0	0.0143922	0	591
	A. gigas	0	0.0143564	0	591
	A. laxifoliata	0.00222121	0.0144101	0.154142	591
	G. littoralis	0	0.00714385	0	591
	L. buchtormensis	0	0.0143564	0	591
	Lig. likiangense	0	0.014303	0	591
	Lig. thomsonii	0	0	NA	591
	M. pimpinelloideum	0	0.00712621	0	591
	P. japonicum	0	0.0143564	0	591
	P. praeruptorum	0	0.00714385	0	591
	S. divaricata	0	0.00714385	0	591
	Ses. montanum	0	0.021639	0	591
infA	A. dahurica	0	0	NA	231
	A. gigas	0	0	NA	231
	A. laxifoliata	0	0	NA	231
	G. littoralis	0	0	NA	231
	L. buchtormensis	0	0	NA	231
	Lig. likiangense	0	0.0191427	0	231
	Lig. thomsonii	0	0	NA	231
	M. pimpinelloideum	0	0	NA	231
	P. japonicum	0	0.0191427	0	231
	P. praeruptorum	0	0	NA	231
	S. divaricata	0	0	NA	231
	Ses. montanum	0	0	NA	231
matK	A. dahurica	0.00255268	0.0029665	0.860502	1515
	A. gigas	0.00170157	0.00296194	0.574481	1515
	A. laxifoliata	0.00340573	0.00594342	0.573026	1515
	G. littoralis	0.00255364	0.00296261	0.861956	1515
	L. buchtormensis	0.00940494	0.00593968	1.58341	1515
	Lig. likiangense	0.00511022	0.00895858	0.570428	1515
	Lig. thomsonii	0.00683487	0.00591971	1.15459	1515
	M. pimpinelloideum	0.00511198	0	NA	1515
	P. japonicum	0.00940975	0.00592916	1.58703	1515
	P. praeruptorum	0.012861	0.00891141	1.4432	1515
	S. divaricata	0.0102628	0.0059458	1.72605	1515
	Ses. montanum	0.00865515	0.0120386	0.718953	1497
ndhA	A. dahurica	0.00366707	0.00747467	0.490599	1089
	A. gigas	0.00366707	0.00747467	0.490599	1089
	A. laxifoliata	0.00489239	0.0150343	0.325416	1089
	G. littoralis	0.00366707	0.00747467	0.490599	1089
	L. buchtormensis	0.00611921	0.00748427	0.81761	1089
	Lig. likiangense	0.00488829	0.00373998	1.30704	1089
	Lig. thomsonii	0.00489342	0.0150246	0.325694	1089
	M. pimpinelloideum	0.005098	0.0106112	0.480434	1089
	P. japonicum	0.00366707	0.0112401	0.326248	1089
	P. praeruptorum	0.00366707	0.0112401	0.326248	1089
	S. divaricata	0.00366707	0.00747467	0.490599	1089
	Ses. montanum	0.00366553	0.015044	0.243654	1089
ndhB	A. dahurica	0.00171886	0	NA	1530
	A. gigas	0.00171886	0.00274396	0.626416	1530
	A. laxifoliata	0.000858811	0	NA	1530
	G. littoralis	0.00171886	0	NA	1530
	L. buchtormensis	0.00171886	0	NA	1530
	Lig. likiangense	0.00171886	0	NA	1530
	Lig. thomsonii	0.00171886	0.00274396	0.626416	1530
	M. pimpinelloideum	0.00171886	0	NA	1530
	P. japonicum	0.00171886	0	NA	1530
	P. praeruptorum	0.00171886	0	NA	1530
	S. divaricata	0.00171886	0	NA	1530
	Ses. montanum	0.00171886	0	NA	1530
ndhC	A. dahurica	0	0	NA	360
	A. gigas	0	0.0244057	0	360
	A. laxifoliata	0	0	NA	360
	G. littoralis	0	0	NA	360
	L. buchtormensis	0	0	NA	360
	Lig. likiangense	0	0	NA	360
	Lig. thomsonii	0	0.0121036	0	360
	M. pimpinelloideum	0	0	NA	360
	P. japonicum	0	0	NA	360
	P. praeruptorum	0	0	NA	360
	S. divaricata	0	0	NA	360
	Ses. montanum	0	0	NA	360
ndhD	A. dahurica	0.000872716	0.00567939	0.153664	1500
	A. gigas	0.000872716	0.00853529	0.102248	1500
	A. laxifoliata	0.0026212	0.00853529	0.307102	1500
	G. littoralis	0.000872716	0.00567939	0.153664	1500
	L. buchtormensis	0	0.0111709	0	1527
	Lig. likiangense	0.000858033	0.0139847	0.0613552	1527
	Lig. thomsonii	0.000858189	0.0139764	0.0614027	1527
	M. pimpinelloideum	0.00174488	0.00569602	0.306333	1500
	P. japonicum	0.000872455	0.00568492	0.153468	1500
	P. praeruptorum	0.00171711	0.005562	0.308722	1527
	S. divaricata	0.000872455	0.00568492	0.153468	1500
	Ses. montanum	0.0017166	0.00836654	0.205175	1527
ndhE	A. dahurica	0.00864937	0	NA	303
	A. gigas	0.00864937	0	NA	303
	A. laxifoliata	0.00864937	0	NA	303
	G. littoralis	0.00864937	0	NA	303
	L. buchtormensis	0.00876363	0	NA	300
	Lig. likiangense	0.00864937	0.0289471	0.298799	303
	Lig. thomsonii	0.00864937	0	NA	303
	M. pimpinelloideum	0.00864937	0	NA	303
	P. japonicum	0.00864937	0	NA	303
	P. praeruptorum	0.00864937	0	NA	303
	S. divaricata	0.0130022	0	NA	303
	Ses. montanum	0.00864937	0.0143339	0.603421	303
ndhF	A. dahurica	0.00517022	0.0162634	0.317905	2244
	A. gigas	0.00574721	0.0183178	0.31375	2244
	A. laxifoliata	0.0083825	0.0214949	0.389976	2235
	G. littoralis	0.00751422	0.0204261	0.367873	2235
	L. buchtormensis	0.01237	0.0158572	0.780086	2226
	Lig. likiangense	0.00344209	0.0266309	0.129252	2244
	Lig. thomsonii	0.0063286	0.0121334	0.521585	2244
	M. pimpinelloideum	0.00517061	0.0203794	0.253717	2244
	P. japonicum	0.00690142	0.0162647	0.42432	2244
	P. praeruptorum	0.00578063	0.0142645	0.405244	2232
	S. divaricata	0.00812944	0.0184241	0.441238	2226
	Ses. montanum	0.00459585	0.00807609	0.569069	2244
ndhG	A. dahurica	0.00251138	0.00778341	0.322659	528
	A. gigas	0.00251165	0	NA	528
	A. laxifoliata	0.00251165	0	NA	528
	G. littoralis	0.00251165	0	NA	528
	L. buchtormensis	0.00503173	0	NA	528
	Lig. likiangense	0.00503605	0.0156017	0.322788	528
	Lig. thomsonii	0.00503121	0	NA	528
	M. pimpinelloideum	0.00502958	0	NA	528
	P. japonicum	0.00251165	0.00778089	0.322797	528
	P. praeruptorum	0.00251165	0.00778089	0.322797	528
	S. divaricata	0.00251165	0.00778089	0.322797	528
	Ses. montanum	0.00251165	0	NA	528
ndhH	A. dahurica	0.00109351	0.0114572	0.0954433	1179
	A. gigas	0.00218779	0.0153359	0.142659	1179
	A. laxifoliata	0.00218862	0.0230921	0.0947778	1179
	G. littoralis	0.00109351	0.0114572	0.0954433	1179
	L. buchtormensis	0.00218996	0.00760247	0.288059	1179
	Lig. likiangense	0.00109393	0.00379465	0.288281	1179
	Lig. thomsonii	0.00328735	0.0114328	0.287536	1179
	M. pimpinelloideum	0.00218821	0.0114648	0.190863	1179
	P. japonicum	0.00438634	0.00760247	0.576962	1179
	P. praeruptorum	0.00218996	0.00760247	0.288059	1179
	S. divaricata	0.00218996	0.0152828	0.143296	1179
	Ses. montanum	0.00218955	0.0152929	0.143174	1179
ndhI	A. dahurica	0.00255436	0.0092441	0.276323	501
	A. gigas	0.00255436	0.0092441	0.276323	501
	A. laxifoliata	0.00255436	0.0092441	0.276323	501
	G. littoralis	0.00255436	0.0092441	0.276323	501
	L. buchtormensis	0.00255436	0.0280813	0.0909629	501
	Lig. likiangense	0.00255436	0.0280813	0.0909629	501
	Lig. thomsonii	0.00768248	0.037804	0.203219	501
	M. pimpinelloideum	0.00255436	0.0092441	0.276323	501
	P. japonicum	0.0051129	0.0186638	0.273947	501
	P. praeruptorum	0.0051129	0.0186638	0.273947	501
	S. divaricata	0.00255436	0.0186036	0.137305	501
	Ses. montanum	0.00512427	0.0185139	0.27678	501
ndhJ	A. dahurica	0.00542407	0.0194934	0.278252	474
	A. gigas	0.00270657	0.00969052	0.279301	474
	A. laxifoliata	0.00542407	0.0194934	0.278252	474
	G. littoralis	0.00270657	0.0195079	0.138742	474
	L. buchtormensis	0.00542695	0.0194563	0.27893	474
	Lig. likiangense	0.00270657	0	NA	474
	Lig. thomsonii	0.00270657	0.00969052	0.279301	474
	M. pimpinelloideum	0.00270657	0.00969052	0.279301	474
	P. japonicum	0.00815136	0.0194893	0.418248	474
	P. praeruptorum	0.00542695	0.0194563	0.27893	474
	S. divaricata	0.00542695	0.0194563	0.27893	474
	Ses. montanum	0.00270657	0.00969052	0.279301	474
ndhK	A. dahurica	0	0	NA	675
	A. gigas	0	0	NA	675
	A. laxifoliata	0	0.0188814	0	675
	G. littoralis	0	0	NA	675
	L. buchtormensis	0.00194962	0.0124941	0.156044	675
	Lig. likiangense	0	0.0062277	0	675
	Lig. thomsonii	0	0.0062277	0	675
	M. pimpinelloideum	0	0.00623441	0	675
	P. japonicum	0.001947	0.0125482	0.155162	675
	P. praeruptorum	0	0.0125076	0	675
	S. divaricata	0.00194897	0.0062277	0.312951	675
	Ses. montanum	0	0.0062277	0	675
petA	A. dahurica	0	0.0221608	0	960
	A. gigas	0	0.0132077	0	960
	A. laxifoliata	0	0.0221439	0	960
	G. littoralis	0	0.0176625	0	960
	L. buchtormensis	0.00136943	0.0266571	0.0513723	960
	Lig. likiangense	0.00273829	0.0404985	0.0676147	960
	Lig. thomsonii	0.00136976	0.022131	0.0618931	960
	M. pimpinelloideum	0.00136951	0.0176625	0.0775378	960
	P. japonicum	0	0.0311878	0	960
	P. praeruptorum	0	0.0311878	0	960
	S. divaricata	0	0.0266522	0	960
	Ses. montanum	0.00136951	0.0266522	0.0513845	960
petB	A. dahurica	0	0	NA	645
	A. gigas	0	0.00646894	0	645
	A. laxifoliata	0	0	NA	645
	G. littoralis	0	0	NA	645
	L. buchtormensis	0	0.0129942	0	645
	Lig. likiangense	0	0	NA	645
	Lig. thomsonii	0	0.00646894	0	645
	M. pimpinelloideum	0.00204537	0	NA	645
	P. japonicum	0	0.0129942	0	645
	P. praeruptorum	0	0.00646894	0	645
	S. divaricata	0	0.00646894	0	645
	Ses. montanum	0	0.0129907	0	645
petD	A. dahurica	0	0.0171126	0	480
	A. gigas	0	0.00850748	0	480
	A. laxifoliata	0	0.00850748	0	480
	G. littoralis	0	0.0258176	0	480
	L. buchtormensis	0	0.00850748	0	480
	Lig. likiangense	0	0.00851052	0	480
	Lig. thomsonii	0	0.0170877	0	480
	M. pimpinelloideum	0	0.00850748	0	480
	P. japonicum	0	0.00850748	0	480
	P. praeruptorum	0	0.00850748	0	480
	S. divaricata	0	0.00850748	0	480
	Ses. montanum	0	0.00850748	0	480
petG	A. dahurica	0	0	NA	111
	A. gigas	0	0	NA	111
	A. laxifoliata	0	0	NA	111
	G. littoralis	0	0	NA	111
	L. buchtormensis	0	0.036469	0	111
	Lig. likiangense	0	0	NA	111
	Lig. thomsonii	0	0	NA	111
	M. pimpinelloideum	0	0	NA	111
	P. japonicum	0	0	NA	111
	P. praeruptorum	0	0	NA	111
	S. divaricata	0	0.036469	0	111
	Ses. montanum	0	0	NA	111
petL	A. dahurica	0	0	NA	93
	A. gigas	0	0	NA	93
	A. laxifoliata	0	0	NA	93
	G. littoralis	0	0	NA	93
	L. buchtormensis	0	0	NA	93
	Lig. likiangense	0	0	NA	93
	Lig. thomsonii	0	0	NA	93
	M. pimpinelloideum	0	0	NA	93
	P. japonicum	0	0.0399533	0	93
	P. praeruptorum	0	0.0399533	0	93
	S. divaricata	0	0	NA	93
	Ses. montanum	0	0	NA	93
petN	A. dahurica	0	0	NA	87
	A. gigas	0	0	NA	87
	A. laxifoliata	0	0	NA	87
	G. littoralis	0	0	NA	87
	L. buchtormensis	0	0	NA	87
	Lig. likiangense	0	0	NA	87
	Lig. thomsonii	0	0	NA	87
	M. pimpinelloideum	0	0	NA	87
	P. japonicum	0	0	NA	87
	P. praeruptorum	0	0	NA	87
	S. divaricata	0	0	NA	87
	Ses. montanum	0	0	NA	87
psaA	A. dahurica	0	0.00764768	0	2250
	A. gigas	0	0.0057303	0	2250
	A. laxifoliata	0	0.00764768	0	2250
	G. littoralis	0	0.00381533	0	2250
	L. buchtormensis	0	0.00956945	0	2250
	Lig. likiangense	0.000580158	0.0153753	0.0377331	2250
	Lig. thomsonii	0	0.00956945	0	2250
	M. pimpinelloideum	0	0.00572657	0	2250
	P. japonicum	0.00116056	0.0134439	0.0863266	2250
	P. praeruptorum	0.000580101	0.0134405	0.0431607	2250
	S. divaricata	0	0.0114981	0	2250
	Ses. montanum	0.000580216	0.00956945	0.0606321	2250
psaB	A. dahurica	0.00117603	0.0100666	0.116826	2202
	A. gigas	0.000587799	0.00804179	0.0730931	2202
	A. laxifoliata	0.00117615	0.0100631	0.116878	2202
	G. littoralis	0.000587786	0.00804242	0.0730857	2202
	L. buchtormensis	0.000587668	0.00401319	0.146434	2202
	Lig. likiangense	0.000587668	0.00200391	0.29326	2202
	Lig. thomsonii	0.000587668	0.00401319	0.146434	2202
	M. pimpinelloideum	0.000587786	0.00602372	0.0975786	2202
	P. japonicum	0.000587668	0.0100735	0.0583378	2202
	P. praeruptorum	0.00176421	0.00602994	0.292575	2202
	S. divaricata	0.000587668	0.0100735	0.0583378	2202
	Ses. montanum	0.000587681	0.0100727	0.0583437	2202
psaC	A. dahurica	0	0.0182237	0	243
	A. gigas	0	0	NA	243
	A. laxifoliata	0	0.0182237	0	243
	G. littoralis	0	0	NA	243
	L. buchtormensis	0	0	NA	243
	Lig. likiangense	0	0	NA	243
	Lig. thomsonii	0	0	NA	243
	M. pimpinelloideum	0	0	NA	243
	P. japonicum	0	0	NA	243
	P. praeruptorum	0	0	NA	243
	S. divaricata	0	0	NA	243
	Ses. montanum	0	0	NA	243
psaI	A. dahurica	0	0	NA	108
	A. gigas	0	0	NA	108
	A. laxifoliata	0	0	NA	108
	G. littoralis	0	0	NA	108
	L. buchtormensis	0	0	NA	108
	Lig. likiangense	0	0	NA	108
	Lig. thomsonii	0	0	NA	108
	M. pimpinelloideum	0	0	NA	108
	P. japonicum	0	0	NA	108
	P. praeruptorum	0	0	NA	108
	S. divaricata	0	0	NA	108
	Ses. montanum	0	0	NA	108
psaJ	A. dahurica	0	0	NA	126
	A. gigas	0	0	NA	126
	A. laxifoliata	0	0	NA	126
	G. littoralis	0	0	NA	126
	L. buchtormensis	0	0	NA	126
	Lig. likiangense	0	0	NA	126
	Lig. thomsonii	0.0106574	0	NA	126
	M. pimpinelloideum	0	0	NA	126
	P. japonicum	0	0	NA	126
	P. praeruptorum	0	0	NA	126
	S. divaricata	0	0.0331664	0	126
	Ses. montanum	0	0	NA	126
psbA	A. dahurica	0	0.00814315	0	1059
	A. gigas	0	0.00814315	0	1059
	A. laxifoliata	0	0.0122481	0	1059
	G. littoralis	0	0.00814315	0	1059
	L. buchtormensis	0	0.0122481	0	1059
	Lig. likiangense	0	0.0163986	0	1059
	Lig. thomsonii	0	0.00814315	0	1059
	M. pimpinelloideum	0	0.0122481	0	1059
	P. japonicum	0	0.0246996	0	1059
	P. praeruptorum	0	0.0288964	0	1059
	S. divaricata	0	0.0122481	0	1059
	Ses. montanum	0	0.0163757	0	1059
psbB	A. dahurica	0	0.0083306	0	1524
	A. gigas	0	0.0027666	0	1524
	A. laxifoliata	0	0.00554344	0	1524
	G. littoralis	0.00086117	0.0111282	0.0773865	1524
	L. buchtormensis	0.00086117	0.0083306	0.103374	1524
	Lig. likiangense	0	0.0027666	0	1524
	Lig. thomsonii	0	0.0139362	0	1524
	M. pimpinelloideum	0	0.0027666	0	1524
	P. japonicum	0	0.0139362	0	1524
	P. praeruptorum	0	0.0111282	0	1524
	S. divaricata	0.0008612	0.0167529	0.0514061	1524
	Ses. montanum	0	0.0111282	0	1524
psbC	A. dahurica	0	0	NA	1419
	A. gigas	0	0	NA	1419
	A. laxifoliata	0	0	NA	1419
	G. littoralis	0	0.00578269	0	1419
	L. buchtormensis	0	0.00578269	0	1419
	Lig. likiangense	0	0	NA	1419
	Lig. thomsonii	0	0	NA	1419
	M. pimpinelloideum	0	0.00578339	0	1419
	P. japonicum	0	0.00578269	0	1419
	P. praeruptorum	0.000933437	0.00578556	0.161339	1419
	S. divaricata	0	0.00889843	0	1383
	Ses. montanum	0	0.00288577	0	1419
psbD	A. dahurica	0	0	NA	1059
	A. gigas	0	0	NA	1059
	A. laxifoliata	0	0.00404147	0	1059
	G. littoralis	0	0	NA	1059
	L. buchtormensis	0	0	NA	1059
	Lig. likiangense	0	0	NA	1059
	Lig. thomsonii	0	0	NA	1059
	M. pimpinelloideum	0	0.00811046	0	1059
	P. japonicum	0	0	NA	1059
	P. praeruptorum	0	0.00404426	0	1059
	S. divaricata	0	0	NA	1059
	Ses. montanum	0	0	NA	1059
psbE	A. dahurica	0	0	NA	249
	A. gigas	0	0	NA	249
	A. laxifoliata	0	0	NA	249
	G. littoralis	0	0	NA	249
	L. buchtormensis	0	0.0176655	0	249
	Lig. likiangense	0	0.0176655	0	249
	Lig. thomsonii	0	0.0176655	0	249
	M. pimpinelloideum	0	0	NA	249
	P. japonicum	0	0.0176655	0	249
	P. praeruptorum	0	0.0176655	0	249
	S. divaricata	0	0.0176655	0	249
	Ses. montanum	0	0.0357571	0	249
psbF	A. dahurica	0	0.0333021	0	117
	A. gigas	0	0.0333021	0	117
	A. laxifoliata	0	0.0333021	0	117
	G. littoralis	0	0.0333021	0	117
	L. buchtormensis	0	0.0333021	0	117
	Lig. likiangense	0	0.0333021	0	117
	Lig. thomsonii	0	0.0333021	0	117
	M. pimpinelloideum	0	0.0333021	0	117
	P. japonicum	0	0.0333021	0	117
	P. praeruptorum	0	0.0333021	0	117
	S. divaricata	0	0.0333021	0	117
	Ses. montanum	0	0.0333021	0	117
psbH	A. dahurica	0	0.0184037	0	219
	A. gigas	0	0	NA	219
	A. laxifoliata	0	0	NA	219
	G. littoralis	0	0	NA	219
	L. buchtormensis	0	0.0184037	0	219
	Lig. likiangense	0	0	NA	219
	Lig. thomsonii	0	0	NA	219
	M. pimpinelloideum	0	0	NA	219
	P. japonicum	0	0.0373002	0	219
	P. praeruptorum	0	0.0566699	0	219
	S. divaricata	0	0	NA	219
	Ses. montanum	0	0	NA	219
psbI	A. dahurica	0	0	NA	108
	A. gigas	1.29085	1.00841	1.28009	108
	A. laxifoliata	0	0	NA	108
	G. littoralis	0	0	NA	108
	L. buchtormensis	0	0	NA	108
	Lig. likiangense	0	0	NA	108
	Lig. thomsonii	0	0	NA	108
	M. pimpinelloideum	0	0.0381061	0	108
	P. japonicum	0	0	NA	108
	P. praeruptorum	0	0	NA	108
	S. divaricata	0	0	NA	108
	Ses. montanum	0	0	NA	108
psbJ	A. dahurica	0	0	NA	120
	A. gigas	0	0	NA	120
	A. laxifoliata	0	0	NA	120
	G. littoralis	0	0	NA	120
	L. buchtormensis	0	0	NA	120
	Lig. likiangense	0	0	NA	120
	Lig. thomsonii	0	0	NA	120
	M. pimpinelloideum	0	0	NA	120
	P. japonicum	0	0	NA	120
	P. praeruptorum	0	0	NA	120
	S. divaricata	0	0	NA	120
	Ses. montanum	0	0	NA	120
psbK	A. dahurica	0	0	NA	183
	A. gigas	0	0	NA	183
	A. laxifoliata	0	0	NA	183
	G. littoralis	0	0	NA	183
	L. buchtormensis	0	0	NA	183
	Lig. likiangense	0	0	NA	183
	Lig. thomsonii	0	0	NA	183
	M. pimpinelloideum	0	0	NA	183
	P. japonicum	0	0	NA	183
	P. praeruptorum	0	0	NA	183
	S. divaricata	0	0	NA	183
	Ses. montanum	0	0	NA	183
psbL	A. dahurica	0	0	NA	114
	A. gigas	0	0	NA	114
	A. laxifoliata	0	0	NA	114
	G. littoralis	0	0	NA	114
	L. buchtormensis	0	0	NA	114
	Lig. likiangense	0	0	NA	114
	Lig. thomsonii	0	0	NA	114
	M. pimpinelloideum	0	0	NA	114
	P. japonicum	0	0	NA	114
	P. praeruptorum	0	0	NA	114
	S. divaricata	0	0	NA	114
	Ses. montanum	0	0.0435758	0	114
psbM	A. dahurica	0	0	NA	114
	A. gigas	0	0	NA	114
	A. laxifoliata	0	0.0811008	0	114
	G. littoralis	0	0	NA	114
	L. buchtormensis	0	0	NA	114
	Lig. likiangense	0	0	NA	114
	Lig. thomsonii	0	0	NA	114
	M. pimpinelloideum	0	0	NA	114
	P. japonicum	0	0	NA	114
	P. praeruptorum	0	0	NA	114
	S. divaricata	0	0	NA	114
	Ses. montanum	0	0	NA	114
psbN	A. dahurica	0	0.0327341	0	129
	A. gigas	0	0	NA	129
	A. laxifoliata	0	0	NA	129
	G. littoralis	0	0	NA	129
	L. buchtormensis	0	0	NA	129
	Lig. likiangense	0	0	NA	129
	Lig. thomsonii	0	0	NA	129
	M. pimpinelloideum	0	0	NA	129
	P. japonicum	0	0	NA	129
	P. praeruptorum	0	0	NA	129
	S. divaricata	0	0	NA	129
	Ses. montanum	0	0	NA	129
psbT	A. dahurica	0	0	NA	99
	A. gigas	1.2984	2.02669	0.640649	96
	A. laxifoliata	0	0	NA	99
	G. littoralis	0	0	NA	99
	L. buchtormensis	0	0	NA	99
	Lig. likiangense	0	0	NA	99
	Lig. thomsonii	0	0	NA	99
	M. pimpinelloideum	0	0	NA	99
	P. japonicum	0	0	NA	99
	P. praeruptorum	0	0	NA	99
	S. divaricata	0	0	NA	99
	Ses. montanum	0	0	NA	99
psbZ	A. dahurica	0	0	NA	186
	A. gigas	0	0	NA	186
	A. laxifoliata	0	0	NA	186
	G. littoralis	0	0	NA	186
	L. buchtormensis	0	0	NA	186
	Lig. likiangense	0	0	NA	186
	Lig. thomsonii	0	0	NA	186
	M. pimpinelloideum	0	0	NA	186
	P. japonicum	0	0	NA	186
	P. praeruptorum	0	0	NA	186
	S. divaricata	0	0	NA	186
	Ses. montanum	0	0	NA	186
rbcL	A. dahurica	0.00370056	0.00293473	1.26095	1425
	A. gigas	0.00370056	0.00293473	1.26095	1425
	A. laxifoliata	0.00370056	0.005881	0.62924	1425
	G. littoralis	0.00370056	0.00293473	1.26095	1425
	L. buchtormensis	0.00929593	0.0207167	0.448716	1425
	Lig. likiangense	0.00834871	0.00588853	1.41779	1425
	Lig. thomsonii	0.0102323	0.00880754	1.16176	1425
	M. pimpinelloideum	0.00277282	0.00293771	0.943872	1425
	P. japonicum	0.00929593	0.014739	0.630701	1425
	P. praeruptorum	0.00929593	0.014739	0.630701	1425
	S. divaricata	0.00929593	0.014739	0.630701	1425
	Ses. montanum	0.0102323	0.00880754	1.16176	1425
rpl2	A. dahurica	0	0.0148211	0	822
	A. gigas	0	0.0148211	0	822
	A. laxifoliata	0	0.0198103	0	822
	G. littoralis	0.00162098	0.0148211	0.10937	822
	L. buchtormensis	0.00487382	0.0248618	0.196037	822
	Lig. likiangense	0.00162064	0.0248831	0.0651299	822
	Lig. thomsonii	0.00162064	0.0248831	0.0651299	822
	M. pimpinelloideum	0	0.0148211	0	822
	P. japonicum	0.00324478	0.0248831	0.130401	822
	P. praeruptorum	0.0032466	0.0350116	0.0927292	822
	S. divaricata	0.00650411	0.0299539	0.217137	822
	Ses. montanum	0.00162064	0.0248831	0.0651299	822
rpl14	A. dahurica	0	0.0112867	0	366
	A. gigas	0	0.0112867	0	366
	A. laxifoliata	0.00362009	0	NA	366
	G. littoralis	0	0	NA	366
	L. buchtormensis	0.00362234	0.0112867	0.320939	366
	Lig. likiangense	0.00362234	0	NA	366
	Lig. thomsonii	0	0.0112867	0	366
	M. pimpinelloideum	0	0	NA	366
	P. japonicum	0	0.0112867	0	366
	P. praeruptorum	0	0.0112867	0	366
	S. divaricata	0	0.0112867	0	366
	Ses. montanum	0	0.0112867	0	366
rpl16	A. dahurica	0.00331462	0	NA	405
	A. gigas	0.00331462	0	NA	405
	A. laxifoliata	0.00331462	0	NA	405
	G. littoralis	0.00331462	0.0197433	0.167886	405
	L. buchtormensis	0.00331462	0.00980669	0.337996	405
	Lig. likiangense	0.00331462	0.00980669	0.337996	405
	Lig. thomsonii	0.00331462	0	NA	405
	M. pimpinelloideum	0.00331462	0	NA	405
	P. japonicum	0.00331511	0.0197347	0.167983	405
	P. praeruptorum	0.00331462	0.00980669	0.337996	405
	S. divaricata	0.00331462	0.00980669	0.337996	405
	Ses. montanum	0.00331462	0	NA	405
rpl20	A. dahurica	0	0.0111959	0	384
	A. gigas	0	0.0111959	0	384
	A. laxifoliata	0	0.0111959	0	384
	G. littoralis	0.00682134	0.0226945	0.300573	384
	L. buchtormensis	0.00340894	0.0111959	0.30448	384
	Lig. likiangense	0	0.0225512	0	384
	Lig. thomsonii	0.00340894	0.0111959	0.30448	384
	M. pimpinelloideum	0	0.0111959	0	384
	P. japonicum	0.00340894	0.0225615	0.151095	384
	P. praeruptorum	0.00340894	0.0111959	0.30448	384
	S. divaricata	0.00340894	0.0111959	0.30448	384
	Ses. montanum	0.00340894	0.0225615	0.151095	384
rpl22	A. dahurica	0.00261304	0.00926193	0.282127	492
	A. gigas	0.00524185	0	NA	492
	A. laxifoliata	0.00261542	0	NA	492
	G. littoralis	0.00523999	0	NA	492
	L. buchtormensis	0.00261542	0.00923215	0.283295	492
	Lig. likiangense	0.00261542	0.00923215	0.283295	492
	Lig. thomsonii	0.00261542	0.00923215	0.283295	492
	M. pimpinelloideum	0.00261542	0	NA	492
	P. japonicum	0.00786379	0.00927358	0.847978	492
	P. praeruptorum	0.0131525	0.00927358	1.41828	492
	S. divaricata	0.00261542	0.0185794	0.14077	492
	Ses. montanum	0.00524105	0.00922558	0.5681	492
rpl23	A. dahurica	0	0	NA	279
	A. gigas	0	0	NA	279
	A. laxifoliata	0	0	NA	279
	G. littoralis	0	0	NA	279
	L. buchtormensis	0	0.015983	0	279
	Lig. likiangense	0.00463782	0	NA	279
	Lig. thomsonii	0.00464531	0	NA	279
	M. pimpinelloideum	0.00464906	0	NA	279
	P. japonicum	0	0.015983	0	279
	P. praeruptorum	0	0.015983	0	279
	S. divaricata	0	0.0323141	0	279
	Ses. montanum	0	0.015983	0	279
rpl32	A. dahurica	0	0	NA	159
	A. gigas	0	0	NA	159
	A. laxifoliata	0	0	NA	159
	G. littoralis	0	0	NA	159
	L. buchtormensis	0.00828112	0	NA	159
	Lig. likiangense	0.00828112	0	NA	159
	Lig. thomsonii	0.016649	0	NA	159
	M. pimpinelloideum	0	0.0268436	0	159
	P. japonicum	0.00828112	0	NA	159
	P. praeruptorum	0.00828112	0	NA	159
	S. divaricata	0.00828112	0	NA	159
	Ses. montanum	0.00828112	0.0270967	0.305613	159
rpl33	A. dahurica	0	0	NA	198
	A. gigas	0	0	NA	198
	A. laxifoliata	0	0	NA	198
	G. littoralis	0.00651849	0	NA	198
	L. buchtormensis	0	0.0469756	0	198
	Lig. likiangense	0.00651849	0	NA	198
	Lig. thomsonii	0	0	NA	198
	M. pimpinelloideum	0	0	NA	198
	P. japonicum	0	0.0231201	0	198
	P. praeruptorum	0	0.0231201	0	198
	S. divaricata	0	0.0231201	0	198
	Ses. montanum	0	0	NA	198
rpl36	A. dahurica	0	0	NA	111
	A. gigas	0	0	NA	111
	A. laxifoliata	0	0	NA	111
	G. littoralis	0	0	NA	111
	L. buchtormensis	0	0	NA	111
	Lig. likiangense	0	0	NA	111
	Lig. thomsonii	0	0	NA	111
	M. pimpinelloideum	0	0	NA	111
	P. japonicum	0	0	NA	111
	P. praeruptorum	0	0	NA	111
	S. divaricata	0	0	NA	111
	Ses. montanum	0	0	NA	111
rpoA	A. dahurica	0.00730559	0.0129479	0.564232	1059
	A. gigas	0.0048635	0	NA	1059
	A. laxifoliata	0.00608332	0.0173111	0.351411	1059
	G. littoralis	0.0048635	0	NA	1059
	L. buchtormensis	0.00364449	0.00428869	0.849792	1059
	Lig. likiangense	0.0036433	0	NA	1059
	Lig. thomsonii	0.00242781	0	NA	1059
	M. pimpinelloideum	0.00502533	0.00447035	1.12415	1023
	P. japonicum	0.0051097	0.00904285	0.565054	1008
	P. praeruptorum	0.0062962	0.00444711	1.4158	1023
	S. divaricata	0.00608687	0	NA	1059
	Ses. montanum	0.00486372	0.0129361	0.375981	1059
rpoB	A. dahurica	0.00244243	0.00670161	0.364454	3210
	A. gigas	0.00162743	0.0053562	0.30384	3210
	A. laxifoliata	0.00122015	0.0067028	0.182036	3210
	G. littoralis	0.00203455	0.00535869	0.379674	3210
	L. buchtormensis	0.00203409	0.00805852	0.252414	3210
	Lig. likiangense	0.00244204	0.00670509	0.364208	3210
	Lig. thomsonii	0.00162715	0.00805333	0.202046	3210
	M. pimpinelloideum	0.00162711	0.00805389	0.202028	3210
	P. japonicum	0.00244174	0.00670785	0.364013	3210
	P. praeruptorum	0.00203437	0.00940568	0.216292	3210
	S. divaricata	0.00203459	0.006704	0.303488	3210
	Ses. montanum	0.00203431	0.00805564	0.252532	3210
rpoC1	A. dahurica	0.00128134	0.0128262	0.0999002	2034
	A. gigas	0.000640113	0.0150077	0.0426522	2034
	A. laxifoliata	0.000640343	0.0149897	0.0427189	2034
	G. littoralis	0.000640113	0.0193514	0.0330784	2034
	L. buchtormensis	0.00384966	0.0171651	0.224272	2034
	Lig. likiangense	0.00192198	0.0128453	0.149625	2034
	Lig. thomsonii	0.00128106	0.0128358	0.0998038	2034
	M. pimpinelloideum	0.00192241	0.0128358	0.14977	2034
	P. japonicum	0.0012812	0.0236937	0.0540733	2034
	P. praeruptorum	0.0012812	0.0236937	0.0540733	2034
	S. divaricata	0.00256488	0.0171508	0.149548	2034
	Ses. montanum	0.00320667	0.0106821	0.300192	2034
rpoC2	A. dahurica	0.00344189	0.00314882	1.09307	4158
	A. gigas	0.00186957	0.00419268	0.445914	4170
	A. laxifoliata	0.00218853	0.00842558	0.259748	4158
	G. littoralis	0.00218853	0.00420096	0.520959	4158
	L. buchtormensis	0.00311868	0.00735162	0.424217	4170
	Lig. likiangense	0.00346196	0.0106091	0.326319	4134
	Lig. thomsonii	0.00247964	0.0041679	0.594936	4194
	M. pimpinelloideum	0.00218847	0.00525532	0.41643	4158
	P. japonicum	0.00532583	0.00842711	0.631987	4158
	P. praeruptorum	0.00499547	0.00841152	0.593885	4170
	S. divaricata	0.00407061	0.00841792	0.483564	4158
	Ses. montanum	0.00280597	0.00735387	0.381564	4170
rps2	A. dahurica	0	0	NA	705
	A. gigas	0	0	NA	705
	A. laxifoliata	0	0	NA	705
	G. littoralis	0	0	NA	705
	L. buchtormensis	0.0018315	0	NA	705
	Lig. likiangense	0	0.00633566	0	705
	Lig. thomsonii	0.00366748	0	NA	705
	M. pimpinelloideum	0	0	NA	705
	P. japonicum	0.00183163	0.00634103	0.288854	705
	P. praeruptorum	0.00183163	0.00634103	0.288854	705
	S. divaricata	0.0018315	0	NA	705
	Ses. montanum	0.0018315	0.00634258	0.288762	705
rps3	A. dahurica	0.00394808	0.0138167	0.285746	654
	A. gigas	0.00394808	0.00687654	0.574137	654
	A. laxifoliata	0.00593403	0.0137835	0.430518	654
	G. littoralis	0.00394808	0.00687654	0.574137	654
	L. buchtormensis	0.00394838	0.0068747	0.574335	654
	Lig. likiangense	0.00791766	0.0068747	1.15171	654
	Lig. thomsonii	0.00593131	0.00687101	0.863237	654
	M. pimpinelloideum	0.00394808	0.00687654	0.574137	654
	P. japonicum	0.00394838	0.0068747	0.574335	654
	P. praeruptorum	0.00593039	0.013813	0.429334	654
	S. divaricata	0.00394838	0.0208161	0.189679	654
	Ses. montanum	0.00593085	0.0278776	0.212746	654
rps4	A. dahurica	0	0.00700661	0	603
	A. gigas	0	0.00700661	0	603
	A. laxifoliata	0	0.00700661	0	603
	G. littoralis	0	0.00700661	0	603
	L. buchtormensis	0	0.00700661	0	603
	Lig. likiangense	0	0.00700661	0	603
	Lig. thomsonii	0	0.00700661	0	603
	M. pimpinelloideum	0.00435964	0.00703018	0.620131	603
	P. japonicum	0.00217892	0.0140793	0.154761	603
	P. praeruptorum	0.00217892	0.0140793	0.154761	603
	S. divaricata	0	0.00700661	0	603
	Ses. montanum	0	0.0141137	0	603
rps7	A. dahurica	0	0	NA	465
	A. gigas	0	0	NA	465
	A. laxifoliata	0	0	NA	465
	G. littoralis	0	0	NA	465
	L. buchtormensis	0	0	NA	465
	Lig. likiangense	0	0	NA	465
	Lig. thomsonii	0.0057354	0	NA	465
	M. pimpinelloideum	0	0	NA	465
	P. japonicum	0	0	NA	465
	P. praeruptorum	0	0	NA	465
	S. divaricata	0	0	NA	465
	Ses. montanum	0.00286045	0	NA	465
rps8	A. dahurica	0.00328445	0	NA	402
	A. gigas	0.00328445	0	NA	402
	A. laxifoliata	0.00328445	0	NA	402
	G. littoralis	0.00328445	0	NA	402
	L. buchtormensis	0.00656643	0	NA	402
	Lig. likiangense	0.00658709	0	NA	402
	Lig. thomsonii	0	0	NA	402
	M. pimpinelloideum	0	0	NA	402
	P. japonicum	0.00657765	0.0104236	0.631036	402
	P. praeruptorum	0.00657765	0.0104236	0.631036	402
	S. divaricata	0.00327975	0	NA	402
	Ses. montanum	0.00327975	0.0104424	0.31408	402
rps11	A. dahurica	0.00328968	0.0375012	0.0877219	414
	A. gigas	0.00328919	0.018524	0.177564	414
	A. laxifoliata	0.00328919	0.0279604	0.117637	414
	G. littoralis	0.00328919	0.018524	0.177564	414
	L. buchtormensis	0.00329289	0.0184656	0.178326	414
	Lig. likiangense	0	0.0184656	0	414
	Lig. thomsonii	0	0.0184656	0	414
	M. pimpinelloideum	0.00329338	0.0184579	0.178427	414
	P. japonicum	0	0.0184656	0	414
	P. praeruptorum	0	0.0184656	0	414
	S. divaricata	0.0032924	0.0184733	0.178225	414
	Ses. montanum	0	0.0184656	0	414
rps12	A. dahurica	0	0	NA	369
	A. gigas	0	0.0103127	0	369
	A. laxifoliata	0	0	NA	369
	G. littoralis	0	0	NA	369
	L. buchtormensis	0	0	NA	369
	Lig. likiangense	0	0	NA	369
	Lig. thomsonii	0	0	NA	369
	M. pimpinelloideum	0	0	NA	369
	P. japonicum	0	0	NA	369
	P. praeruptorum	0	0	NA	369
	S. divaricata	0.0036918	0	NA	369
	Ses. montanum	0.0036918	0	NA	369
rps14	A. dahurica	0.00436114	0	NA	300
	A. gigas	0.00436114	0	NA	300
	A. laxifoliata	0.00436114	0	NA	300
	G. littoralis	0.00436114	0	NA	300
	L. buchtormensis	0.00436114	0	NA	300
	Lig. likiangense	0.00436114	0	NA	300
	Lig. thomsonii	0.00436114	0.0144163	0.302515	300
	M. pimpinelloideum	0.00436114	0	NA	300
	P. japonicum	0.00436114	0	NA	300
	P. praeruptorum	0.00436114	0	NA	300
	S. divaricata	0.00436114	0	NA	300
	Ses. montanum	0.00436114	0	NA	300
rps15	A. dahurica	0.00475948	0.0170775	0.278699	270
	A. gigas	0.00954936	0	NA	270
	A. laxifoliata	0.00475948	0	NA	270
	G. littoralis	0.00953351	0	NA	270
	L. buchtormensis	0.00475948	0.0170775	0.278699	270
	Lig. likiangense	0.00475075	0.0171909	0.276352	270
	Lig. thomsonii	0.00475948	0.0170775	0.278699	270
	M. pimpinelloideum	0.00475948	0	NA	270
	P. japonicum	0.00475948	0.0345529	0.137745	270
	P. praeruptorum	0.00475948	0.0170775	0.278699	270
	S. divaricata	0.00954762	0.0345757	0.276137	270
	Ses. montanum	0.0143461	0.0171797	0.83506	270
rps16	A. dahurica	0	0	NA	234
	A. gigas	0	0	NA	234
	A. laxifoliata	0	0	NA	234
	G. littoralis	0	0	NA	234
	L. buchtormensis	0.0115124	0	NA	234
	Lig. likiangense	0.0173006	0	NA	234
	Lig. thomsonii	0.00572836	0	NA	234
	M. pimpinelloideum	0	0	NA	234
	P. japonicum	0.0115124	0	NA	234
	P. praeruptorum	0.0115124	0	NA	234
	S. divaricata	0.0115124	0	NA	234
	Ses. montanum	0.00572836	0	NA	234
rps18	A. dahurica	0.00433153	0.0141246	0.306665	303
	A. gigas	0	0	NA	303
	A. laxifoliata	0	0.0140983	0	303
	G. littoralis	0	0.0284501	0	303
	L. buchtormensis	0	0.0140983	0	303
	Lig. likiangense	0.00433324	0.0141064	0.307182	303
	Lig. thomsonii	0	0.0286075	0	303
	M. pimpinelloideum	0.00869819	0	NA	303
	P. japonicum	0.00433076	0.0141328	0.306434	303
	P. praeruptorum	0	0.0140983	0	303
	S. divaricata	0.00868514	0.0141409	0.614186	303
	Ses. montanum	0	0.0140983	0	303
rps19	A. dahurica	0	0.0317689	0	276
	A. gigas	0.00473944	0.0157064	0.301752	276
	A. laxifoliata	0.00473855	0.0157163	0.301506	276
	G. littoralis	0	0.0157064	0	276
	L. buchtormensis	0	0	NA	276
	Lig. likiangense	0.00473355	0	NA	276
	Lig. thomsonii	0	0	NA	276
	M. pimpinelloideum	0.00473855	0.0157163	0.301506	276
	P. japonicum	0	0	NA	276
	P. praeruptorum	0	0	NA	276
	S. divaricata	0	0	NA	276
	Ses. montanum	0	0	NA	276
ycf1	A. dahurica	0.0150784	0.0129564	1.16378	5379
	A. gigas	0.00672992	0.00359113	1.87404	5445
	A. laxifoliata	0.00907531	0.00720572	1.25946	5439
	G. littoralis	0.00673134	0.00538876	1.24914	5445
	L. buchtormensis	0.0112657	0.00636637	1.76957	5397
	Lig. likiangense	0.0102986	0.00884854	1.16387	5436
	Lig. thomsonii	0.00884079	0.00269456	3.28098	5439
	M. pimpinelloideum	0.00883487	0.0117139	0.75422	5445
	P. japonicum	0.0107959	0.0109352	0.987261	5397
	P. praeruptorum	0.0116227	0.0141599	0.820818	5397
	S. divaricata	0.0105594	0.00727288	1.45189	5397
	Ses. montanum	0.0104672	0.0099238	1.05476	5445
ycf2	A. dahurica	0.00942079	0.0107209	0.87873	6327
	A. gigas	0.00845308	0.0107538	0.786055	6291
	A. laxifoliata	0.00868432	0.0137502	0.631578	6273
	G. littoralis	0.0111685	0.010792	1.03489	6270
	L. buchtormensis	0.0125164	0.0132492	0.944687	6285
	Lig. likiangense	0.0106361	0.00955938	1.11264	6003
	Lig. thomsonii	0.00862589	0.0110306	0.781998	6267
	M. pimpinelloideum	0.0056526	0.00625023	0.904383	6249
	P. japonicum	0.0133993	0.0140343	0.954755	6261
	P. praeruptorum	0.0142656	0.0185695	0.768224	6246
	S. divaricata	0.0131515	0.014	0.939393	6279
	Ses. montanum	0.0119413	0.0162193	0.736238	6267
ycf3	A. dahurica	0	0	NA	504
	A. gigas	0	0.008892	0	504
	A. laxifoliata	0	0	NA	504
	G. littoralis	0	0.008892	0	504
	L. buchtormensis	0	0.008892	0	504
	Lig. likiangense	0	0.0270841	0	504
	Lig. thomsonii	0	0.008892	0	504
	M. pimpinelloideum	0	0	NA	504
	P. japonicum	0	0.017897	0	504
	P. praeruptorum	0	0.017897	0	504
	S. divaricata	0	0.0178907	0	504
	Ses. montanum	0	0.0178907	0	504
ycf4	A. dahurica	0.00236018	0.00787593	0.299671	552
	A. gigas	0.00236018	0.00787593	0.299671	552
	A. laxifoliata	0.00236018	0.00787593	0.299671	552
	G. littoralis	0.00236018	0.00787593	0.299671	552
	L. buchtormensis	0.00235922	0.0239132	0.0986577	552
	Lig. likiangense	0.0023573	0.0079082	0.298083	552
	Lig. thomsonii	0.00236115	0.0158138	0.149309	552
	M. pimpinelloideum	0	0.00788665	0	552
	P. japonicum	0.00472396	0.0158789	0.2975	552
	P. praeruptorum	0.00235922	0.0239132	0.0986577	552
	S. divaricata	0.00472782	0.0158354	0.298559	552
	Ses. montanum	0.00235922	0.00788665	0.299141	552
