# Supplementary material
Source: MDPI journal article supplement (https://www.mdpi.com/1424-2818/14/5/323)
Supplement: s1 [file s1 › supplementary materials/Table S6.xlsx]

## Sheet: Sheet1
Table S6. Species included in the phylogenetic analyses with their accession numbers.
Species	Cp genome	ITS
Peucedanum japonicum	NC_034644	KP058321
Peucedanum praeruptorum	MN016968	MH711311
Saposhnikovia divaricata	MN857472	OL473106
Libanotis buchtormensis	NC_058871	LC195584
Seseli montanum	KM035851	MG697141
Ligusticum thomsonii	NC_049058	MT974011
Angelica dahurica	NC_029392	OL472982
Angelica laxifoliata	NC_040122	MH807952
Glehnia littoralis	NC_034645	KY829535
Angelica gigas	KX118044	KM051435
Melanosciadium pimpinelloideum	NC_047428	JX514720
Cnidium monnieri	OL839918	OL473048
Ligusticum likiangense	NC_049055	MT974022
Heracleum yungningense	NC_047287	HQ686450
Heracleum moellendorffii	NC_042242	MH712581
Ligusticum sinense	MH260704	MH712648
Cnidium officinale	NC_039760	JN853780
Ligusticum chuanxiong	NC_038088	AY548231
Ligusticum jeholense	MT561037	OL473117
Angelica sinensis	NC_042826	MH807960
Anethum graveolens	NC_029470	MZ191025
Foeniculum vulgare	NC_029469	MW366653
Petroselinum crispum	NC_015821	MZ191031
Prangos lipskyi	KY652266	KJ395453
Prangos fedtschenkoi	KY652265	KJ395469
Ligusticum delavayi	NC_049052	MT974017
Pterygopleurum neurophyllum	NC_033345	AY509127
Pternopetalum davidii	MW316663	MH807989
Daucus carota	NC_008325	MH711237
Cuminum cyminum	NC_046879	MH645763
Anthriscus cerefolium	NC_015113	MH645766
Oenanthe javanica	NC_049874	OL473125
Cicuta virosa	NC_037711	OL473016
Hansenia oviformis	NC_035055	MT337430
Hansenia forrestii	NC_035056	MN049519
Hansenia phaea	MK801097	MT337432
Changium smyrnioides	NC_053938	DQ517340
Chuanminshen violaceum	KU921430	HQ185256
Pleurospermum uralense	NC_033343	JF977839
Bupleurum falcatum	NC_027834	AF479290
Bupleurum boissieuanum	NC_036017	KR902793
Bupleurum latissimum	NC_033346	AY551292
Chamaesium delavayi	MN119367	MT827307
Chamaesium jiulongense	MN119368	MT827505
Chamaesium mallaeanum	MN119369	MT678858
Sanicula orthacantha	MK293943	MH428057
Sanicula chinensis	MK208987	MH711355
Eryngium planum	MT561039	EU169002
